# Supplementary material
Source: publisher site journal article supplement (https://www.spandidos-publications.com/3369/downloadSupplementary)

Figure S1. Quantification of (A) PAS, (B) Masson's trichrome and (C) Sirius red staining shown in Fig. 3. \* $P < 0.05$ . PAS, periodic acid-Schiff; NC, negative control; DM, diabetes mellitus; SAX, saxagliptin.

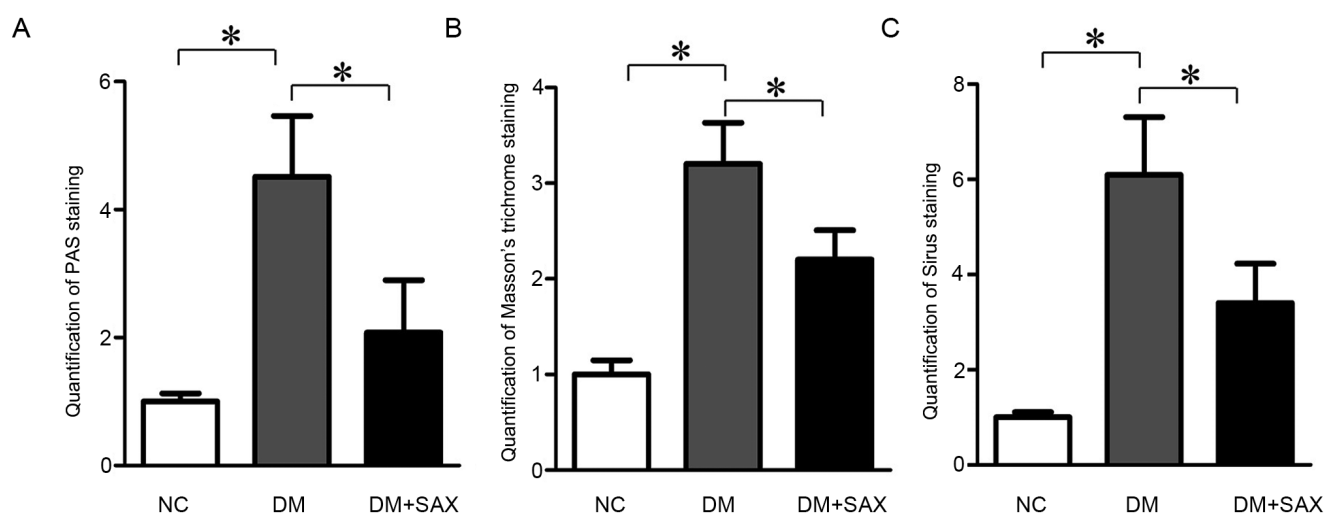

Figure S2. (A) Bax and Bcl2 expression in the kidneys of rats in the NC, DM and DM + SAX groups as determined by western blot analysis. (B) Bax and Bcl2 protein expression in the control group HK2 cells, HG group HK2 cells, and HG with SAX group HK2 cells as determined by western blot analysis. \* $P < 0.05$ . NC, negative control; DM, diabetes mellitus; SAX, saxagliptin; HG, high glucose; Con, control.

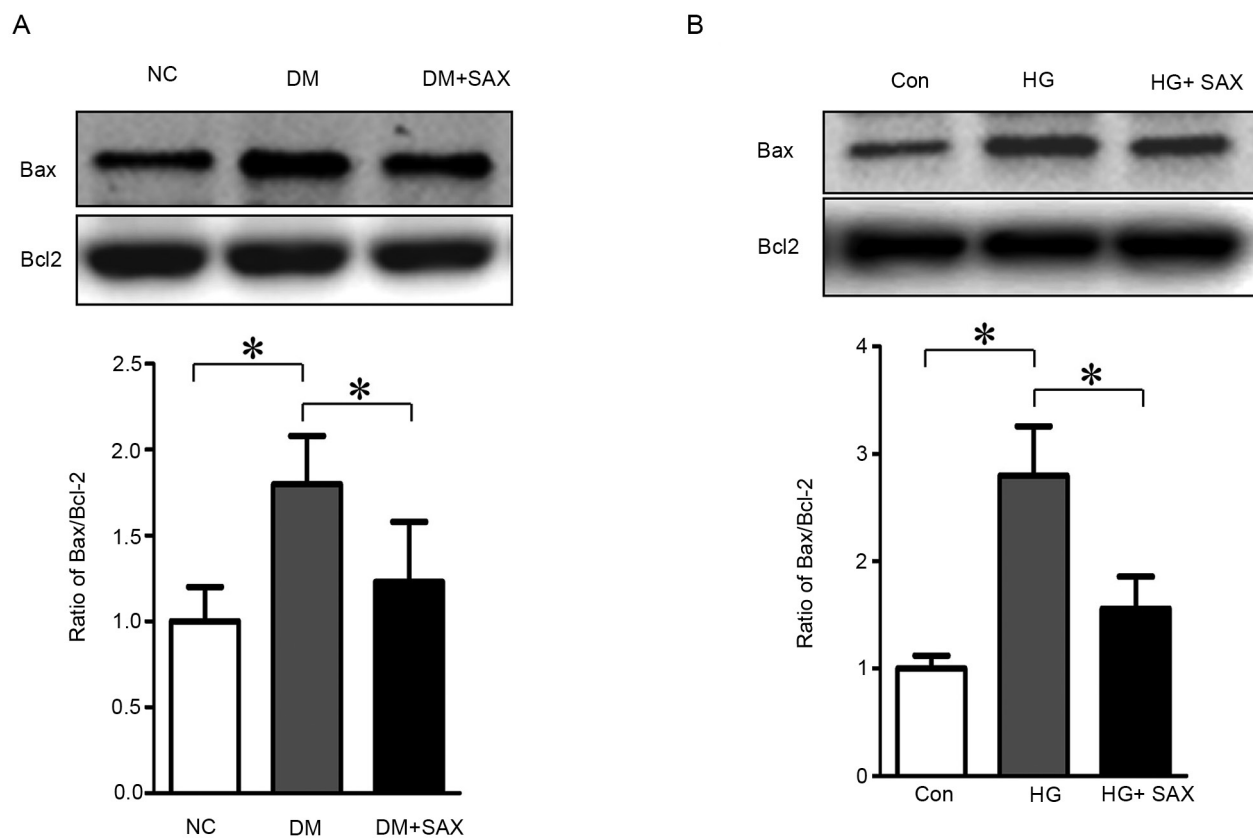

Supplement: Supplementary file 1 [file downloadSupplementary]
